# Supplementary material for: A facile assay for rapid detection of COVID-19 antibodies
Source: Royal Society of Chemistry journal article supplement (doi:10.1039/d0ra04107f), 2020-01-01
Supplement: d0ra04107f3.xlsx [file d0ra04107f3.xlsx]

## Sheet: Interferences
	Interferences in confirmed cases
No.	Total bilirubin (μmol/L)	Direct Bilirubin (μmol/L)	Indirect Bilirubin (μmol/L)
6	185.3	112.5	72.8
19	165.5	10.8	154.7
78	79.3	68.6	10.7
104	116.5	12.8	103.7
179	103.8	89.4	14.4
	Triglyceride (mmol/L)	Cholesterol (mmol/L)
35	71.03	25.24
43	0.55	3.58
64	13.77	12.09
99	2.62	16.01
117	3.57	9.82
162	1.69	8.85
181	12.82	11.45
199	37.48	13.49
212	29.35	6.79
